# Supplementary material for: Interpretation Bias in Online and Offline Social Environments and Associations with Social Anxiety, Peer Victimization, and Avoidance Behavior
Source: Springer Nature journal article supplement (doi:10.1007/s10608-020-10097-1), 2020-04-08
Supplement: MOESM1 [file 17880386]

Table S1

Factor loadings from PCA factor analysis of the negative interpretations from the 5 offline and 7 online social items from the AIBQ 2.0, with oblimin rotation

| Item | | Online | Offline |
| --- | --- | --- | --- |
| 1. | *Invite to birthday.* They (fellow students) don’t want to come because they don’t like me. | -.05 | **.77** |
| 2. | *Presentation in class.* They (fellow students) didn’t think my presentation was interesting. | .37 | .13 |
| 3. | *Students look at you.* They’re (fellow students) gossiping about me. | -.08 | **.78** |
| 4. | *Begin conversation*. They (fellow students) don’t want me hanging around because they don’t like me. | .14 | **.65** |
| 5. | *At a party.* I stand out like a sore thumb. He or she probably thinks I’m pathetic. | -.00 | **.68** |
| 6. | *WhatsApp*. They (fellow students) must think my message was stupid and won’t respond at all. | .01 | .71 |
| 7. | *Facebook friend invite*. He/she didn’t really like me at all and doesn’t want to be friends on Facebook. | .20 | .54 |
| 8. | *Online gaming*. They’ve (friends) most probably secretly agreed to play a different online game because they don’t want to game with me. | **.67** | .07 |
| 9. | *Instagram*. I’ve clearly made a mess of the dish because it isn’t recognizable (by an Instagram ‘follower’). | **.87** | -.19 |
| 10. | *Facebook message*. This person (acquaintance) doesn’t like me and therefore didn’t ‘like’ my message. | **.56** | .16 |
| 11. | *Twitter*. Nobody thinks my opening tweet is funny and that’s why I only have one follower. | **.73** | -.00 |
| 12. | *MESH dating*. I scare the other person off when chatting. | .38 | .31 |

*Note*. Factor loadings in bold indicate the items included in the online and offline interpretation bias subscales.
